# Supplementary material for: Missense Mutation in CAPN1 Is Associated with Spinocerebellar Ataxia in the Parson Russell Terrier Dog Breed
Source: PLoS One. 2013 May 31;8(5):e64627. doi: 10.1371/journal.pone.0064627 (PMC3669408; doi:10.1371/journal.pone.0064627)
Supplement: Figure S4 — Genotyping results of the eight outlier cases for 48 SNPs across the disease-associated interval. The outlier cases are not homozygous for the disease-associated haplotype. (PDF) [file pone.0064627.s004.pdf]

|     |                |          | GWAS CASE COHORT |           |           |           |           |           |           |           |           |           |           |           |           |           |           |           | GWAS CONTROL COHORT |           |           |           |           |           |           |           |           |           |           |           |           |           |           |           | OUTLIERS (Individuals with clinical signs of ataxia but not homozygous for the CAPN1 mutation) |           |           |           |           |           |           |           |   |   |   |   |   |
|-----|----------------|----------|------------------|-----------|-----------|-----------|-----------|-----------|-----------|-----------|-----------|-----------|-----------|-----------|-----------|-----------|-----------|-----------|---------------------|-----------|-----------|-----------|-----------|-----------|-----------|-----------|-----------|-----------|-----------|-----------|-----------|-----------|-----------|-----------|------------------------------------------------------------------------------------------------|-----------|-----------|-----------|-----------|-----------|-----------|-----------|---|---|---|---|---|
| Chr | SNP name       | Position | 12118_PRT        | 12573_PRT | 12835_PRT | 12854_PRT | 14528_PRT | 17526_PRT | 17545_PRT | 17546_PRT | 17547_PRT | 17933_PRT | 18188_PRT | 18500_PRT | 11445_PRT | 11453_PRT | 11837_PRT | 12015_PRT | 11291_PRT           | 12018_PRT | 12837_PRT | 12898_PRT | 12899_PRT | 12947_PRT | 17477_PRT | 17529_PRT | 17553_PRT | 18032_PRT | 18501_PRT | 18502_PRT | 11294_PRT | 11491_PRT | 12125_PRT | 12205_PRT | 12835_PRT                                                                                      | 17760_PRT | 18355_PRT | 19371_PRT | 19936_PRT | 21224_PRT | 21225_PRT | 21150_PRT |   |   |   |   |   |
| 18  | BICF2P970496   | 52492443 | 1.6E-05          | G         | G         | G         | G         | G         | G         | G         | G         | G         | G         | G         | G         | G         | G         | G         | G                   | G         | G         | G         | G         | G         | G         | G         | G         | G         | G         | G         | G         | G         | G         | G         | G                                                                                              | G         | G         | G         | G         | G         | G         | G         | G | G | G | G |   |
| 18  | BICF2P958336   | 52619327 | 9.48E-06         | A         | A         | A         | G         | A         | G         | A         | G         | A         | A         | A         | A         | A         | A         | A         | A                   | A         | A         | A         | A         | A         | A         | A         | A         | A         | A         | A         | A         | A         | A         | A         | A                                                                                              | A         | A         | A         | A         | A         | A         | A         | A | A | A | A | A |
| 18  | BICF2P1438978  | 52840884 | 7.43E-07         | A         | A         | A         | A         | C         | A         | C         | A         | A         | A         | A         | A         | A         | A         | A         | A                   | A         | A         | A         | A         | A         | A         | A         | A         | A         | A         | A         | A         | A         | A         | A         | A                                                                                              | A         | A         | A         | A         | A         | A         | A         | A | A | A | A | A |
| 18  | BICF2P880099   | 52985150 | 5.31E-05         | C         | C         | C         | C         | C         | C         | C         | C         | C         | C         | C         | C         | C         | C         | C         | C                   | C         | C         | C         | C         | C         | C         | C         | C         | C         | C         | C         | C         | C         | C         | C         | C                                                                                              | C         | C         | C         | C         | C         | C         | C         | C | C | C | C | C |
| 18  | BICF2P1127143  | 53097882 | 6.31E-05         | A         | A         | A         | A         | G         | A         | A         | A         | A         | A         | A         | A         | A         | A         | A         | A                   | A         | A         | A         | A         | A         | A         | A         | A         | A         | A         | A         | A         | A         | A         | A         | A                                                                                              | A         | A         | A         | A         | A         | A         | A         | A | A | A | A | A |
| 18  | BICF2P448303   | 53197305 | 9.93E-05         | A         | A         | A         | A         | G         | A         | A         | A         | A         | A         | A         | A         | A         | A         | A         | A                   | A         | A         | A         | A         | A         | A         | A         | A         | A         | A         | A         | A         | A         | A         | A         | A                                                                                              | A         | A         | A         | A         | A         | A         | A         | A | A | A | A | A |
| 18  | BICF2P129634   | 53233190 | 0.000285         | A         | A         | A         | A         | A         | A         | A         | A         | A         | A         | A         | A         | A         | A         | A         | A                   | A         | A         | A         | A         | A         | A         | A         | A         | A         | A         | A         | A         | A         | A         | A         | A                                                                                              | A         | A         | A         | A         | A         | A         | A         | A | A | A | A | A |
| 18  | BICF2P539360   | 53394191 | 4.06E-05         | G         | G         | G         | G         | A         | G         | G         | G         | G         | G         | G         | G         | G         | G         | G         | G                   | G         | G         | G         | G         | G         | G         | G         | G         | G         | G         | G         | G         | G         | G         | G         | G                                                                                              | G         | G         | G         | G         | G         | G         | G         | G | G | G | G | G |
| 18  | BICF2P1329203  | 53468436 | 0.01041          | A         | A         | A         | A         | G         | A         | A         | A         | A         | A         | A         | A         | A         | A         | A         | A                   | A         | A         | A         | A         | A         | A         | A         | A         | A         | A         | A         | A         | A         | A         | A         | A                                                                                              | A         | A         | A         | A         | A         | A         | A         | A | A | A | A | A |
| 18  | BICF2P76201    | 53517306 | 0.08628          | G         | G         | G         | G         | A         | G         | G         | G         | G         | G         | G         | G         | G         | G         | G         | G                   | G         | G         | G         | G         | G         | G         | G         | G         | G         | G         | G         | G         | G         | G         | G         | G                                                                                              | G         | G         | G         | G         | G         | G         | G         | G | G | G | G | G |
| 18  | BICF2P1155995  | 53644828 | 2.18E-05         | A         | A         | A         | A         | G         | A         | A         | A         | A         | A         | A         | A         | A         | A         | A         | A                   | A         | A         | A         | A         | A         | A         | A         | A         | A         | A         | A         | A         | A         | A         | A         | A                                                                                              | A         | A         | A         | A         | A         | A         | A         | A | A | A | A | A |
| 18  | BICF2P753571   | 53696412 | 5.31E-05         | A         | A         | A         | A         | G         | A         | A         | A         | A         | A         | A         | A         | A         | A         | A         | A                   | A         | A         | A         | A         | A         | A         | A         | A         | A         | A         | A         | A         | A         | A         | A         | A                                                                                              | A         | A         | A         | A         | A         | A         | A         | A | A | A | A | A |
| 18  | BICF2P327014   | 53729092 | 2.18E-05         | A         | A         | A         | A         | G         | A         | A         | A         | A         | A         | A         | A         | A         | A         | A         | A                   | A         | A         | A         | A         | A         | A         | A         | A         | A         | A         | A         | A         | A         | A         | A         | A                                                                                              | A         | A         | A         | A         | A         | A         | A         | A | A | A | A | A |
| 18  | BICF2P986209   | 53791895 | 2.18E-05         | C         | C         | C         | C         | G         | C         | C         | C         | C         | C         | C         | C         | C         | C         | C         | C                   | C         | C         | C         | C         | C         | C         | C         | C         | C         | C         | C         | C         | C         | C         | C         | C                                                                                              | C         | C         | C         | C         | C         | C         | C         | C | C | C | C |   |
| 18  | BICF2P102870   | 53848702 | 0.000632         | A         | A         | A         | A         | C         | A         | A         | A         | A         | A         | A         | A         | A         | A         | A         | A                   | A         | A         | A         | A         | A         | A         | A         | A         | A         | A         | A         | A         | A         | A         | A         | A                                                                                              | A         | A         | A         | A         | A         | A         | A         | A | A | A | A | A |
| 18  | BICF2P1282644  | 53907984 | 0.000125         | A         | A         | A         | A         | G         | A         | A         | A         | A         | A         | A         | A         | A         | A         | A         | A                   | A         | A         | A         | A         | A         | A         | A         | A         | A         | A         | A         | A         | A         | A         | A         | A                                                                                              | A         | A         | A         | A         | A         | A         | A         | A | A | A | A | A |
| 18  | BICF2P660897   | 53932040 | 0.000125         | G         | G         | G         | A         | G         | G         | G         | G         | G         | G         | G         | G         | G         | G         | G         | G                   | G         | G         | G         | G         | G         | G         | G         | G         | G         | G         | G         | G         | G         | G         | G         | G                                                                                              | G         | G         | G         | G         | G         | G         | G         | G | G | G | G | G |
| 18  | BICF2P1337495  | 53981168 | 5.31E-05         | A         | A         | A         | A         | G         | A         | A         | A         | A         | A         | A         | A         | A         | A         | A         | A                   | A         | A         | A         | A         | A         | A         | A         | A         | A         | A         | A         | A         | A         | A         | A         | A                                                                                              | A         | A         | A         | A         | A         | A         | A         | A | A | A | A | A |
| 18  | BICF2P326274   | 54008916 | 0.000576         | G         | G         | G         | G         | G         | G         | G         | G         | G         | G         | G         | G         | G         | G         | G         | G                   | G         | G         | G         | G         | G         | G         | G         | G         | G         | G         | G         | G         | G         | G         | G         | G                                                                                              | G         | G         | G         | G         | G         | G         | G         | G | G | G | G | G |
| 18  | BICF2P152937   | 54062783 | 2.18E-05         | A         | A         | A         | A         | G         | A         | A         | A         | A         | A         | A         | A         | A         | A         | A         | A                   | A         | A         | A         | A         | A         | A         | A         | A         | A         | A         | A         | A         | A         | A         | A         | A                                                                                              | A         | A         | A         | A         | A         | A         | A         | A | A | A | A | A |
| 18  | BICF2S23645462 | 54287582 | 5.31E-05         | A         | A         | A         | A         | G         | A         | A         | A         | A         | A         | A         | A         | A         | A         | A         | A                   | A         | A         | A         | A         | A         | A         | A         | A         | A         | A         | A         | A         | A         | A         | A         | A                                                                                              | A         | A         | A         | A         | A         | A         | A         | A | A | A | A | A |
| 18  | BICF2P680854   | 54395197 | 8.66E-06         | G         | G         | G         | A         | G         | G         | G         | G         | G         | G         | G         | G         | G         | G         | G         | G                   | G         | G         | G         | G         | G         | G         | G         | G         | G         | G         | G         | G         | G         | G         | G         | G                                                                                              | G         | G         | G         | G         | G         | G         | G         | G | G | G | G |   |
| 18  | TIGRP2P257487  | 54419119 | 0.000576         | G         | G         | G         | G         | G         | G         | G         | G         | G         | G         | G         | G         | G         | G         | G         | G                   | G         | G         | G         | G         | G         | G         | G         | G         | G         | G         | G         | G         | G         | G         | G         | G                                                                                              | G         | G         | G         | G         | G         | G         | G         | G | G | G | G |   |
| 18  | BICF2S23026958 | 54576931 | 8.66E-06         | G         | G         | G         | A         | G         | G         | G         | G         | G         | G         | G         | G         | G         | G         | G         | G                   | G         | G         | G         | G         | G         | G         | G         | G         | G         | G         | G         | G         | G         | G         | G         | G                                                                                              | G         | G         | G         | G         | G         | G         | G         | G | G | G | G |   |
| 18  | BICF2P210400   | 54648370 | 5.37E-05         | A         | A         | A         | A         | A         | A         | A         | A         | A         | A         | A         | A         | A         | A         | A         | A                   | A         | A         | A         | A         | A         | A         | A         | A         | A         | A         | A         | A         | A         | A         | A         | A                                                                                              | A         | A         | A         | A         | A         | A         | A         | A | A | A | A | A |
| 18  | TIGRP2P257540  | 54707786 | 5.37E-05         | A         | A         | A         | A         | A         | A         | A         | A         | A         | A         | A         | A         | A         | A         | A         | A                   | A         | A         | A         | A         | A         | A         | A         | A         | A         | A         | A         | A         | A         | A         | A         | A                                                                                              | A         | A         | A         | A         | A         | A         | A         | A | A | A | A | A |
| 18  | BICF2P1047524  | 54796248 | 0.001362         | A         | A         | A         | A         | G         | A         | A         | A         | A         | A         | A         | A         | A         | A         | A         | A                   | A         | A         | A         | A         | A         | A         | A         | A         | A         | A         | A         | A         | A         | A         | A         | A                                                                                              | A         | A         | A         | A         | A         | A         | A         | A | A | A | A | A |
| 18  | BICF2P1238819  | 54809788 | 0.000576         | A         | A         | A         | A         | A         | A         | A         | A         | A         | A         | A         | A         | A         | A         | A         | A                   | A         | A         | A         | A         | A         | A         | A         | A         | A         | A         | A         | A         | A         | A         | A         | A                                                                                              | A         | A         | A         | A         | A         | A         | A         | A | A | A | A | A |
| 18  | BICF2P642311   | 54837807 | 0.002497         | G         | G         | G         | G         | G         | G         | G         | G         | G         | G         | G         | G         | G         | G         | G         | G                   | G         | G         | G         | G         | G         | G         | G         | G         | G         | G         | G         | G         | G         | G         | G         | G                                                                                              | G         | G         | G         | G         | G         | G         | G         | G | G | G | G | G |
| 18  | TIGRP2P257607  | 54883940 | 2.18E-05         | G         | G         | G         | A         | G         | G         | G         | G         | G         | G         | G         | G         | G         | G         | G         | G                   | G         | G         | G         | G         | G         | G         | G         | G         | G         | G         | G         | G         | G         | G         | G         | G                                                                                              | G         | G         | G         | G         | G         | G         | G         | G | G | G | G |   |
| 18  | BICF2P525884   | 54961775 | 0.000576         | G         | G         | G         | G         | G         | G         | G         | G         | G         | G         | G         | G         | G         | G         | G         | G                   | G         | G         | G         | G         | G         | G         | G         | G         | G         | G         | G         | G         | G         | G         | G         | G                                                                                              | G         | G         | G         | G         | G         | G         | G         | G | G | G | G | G |
| 18  | BICF2P156099   | 54981333 | 1.5E-06          | G         | G         | G         | G         | G         | G         | G         | G         | G         | G         | G         | G         | G         | G         | G         | G                   | G         | G         | G         | G         | G         | G         | G         | G         | G         | G         | G         | G         | G         | G         | G         | G                                                                                              | G         | G         | G         | G         | G         | G         | G         | G | G | G | G | G |
| 18  | BICF2P651617   | 55033139 | 7.04E-09         | A         | A         | A         | A         | A         | A         | A         | A         | A         | A         | A         | A         | A         | A         | A         | A                   | A         | A         | A         | A         | A         | A         | A         | A         | A         | A         | A         | A         | A         | A         | A         | A                                                                                              | A         | A         | A         | A         | A         | A         | A         | A | A | A | A | A |
| 18  | BICF2S23514719 | 55158205 | 0.000268         | G         | G         | G         | G         | G         | G         | G         | G         | G         | G         | G         | G         | G         | G         | G         | G                   | G         | G         | G         | G         | G         | G         | G         | G         | G         | G         | G         | G         | G         | G         | G         | G                                                                                              | G         | G         | G         | G         | G         | G         | G         | G | G | G | G | G |
| 18  | TIGRP2P257664  | 55208015 | 2.18E-05         | G         | G         | G         | A         | G         | G         | G         | G         | G         | G         | G         | G         | G         | G         | G         | G                   | G         | G         | G         | G         | G         | G         | G         | G         | G         | G         | G         | G         | G         | G         | G         | G                                                                                              | G         | G         | G         | G         | G         | G         | G         | G | G | G | G | G |
| 18  | BICF2P363526   | 55311435 | 5.37E-05         | A         | A         | A         | A         | A         | A         | A         | A         | A         | A         | A         | A         | A         | A         | A         | A                   | A         | A         | A         | A         | A         | A         | A         | A         | A         | A         | A         | A         | A         | A         | A         | A                                                                                              | A         | A         | A         | A         | A         | A         | A         | A | A | A |   |   |
