# Supplementary material for: Missense Mutation in CAPN1 Is Associated with Spinocerebellar Ataxia in the Parson Russell Terrier Dog Breed
Source: PubMed Central journal article supplement (PMC3669408; doi:10.1371/journal.pone.0064627), 2013-05-31

### PRT SCA association analysis (Fast Mixed Model adjusted)

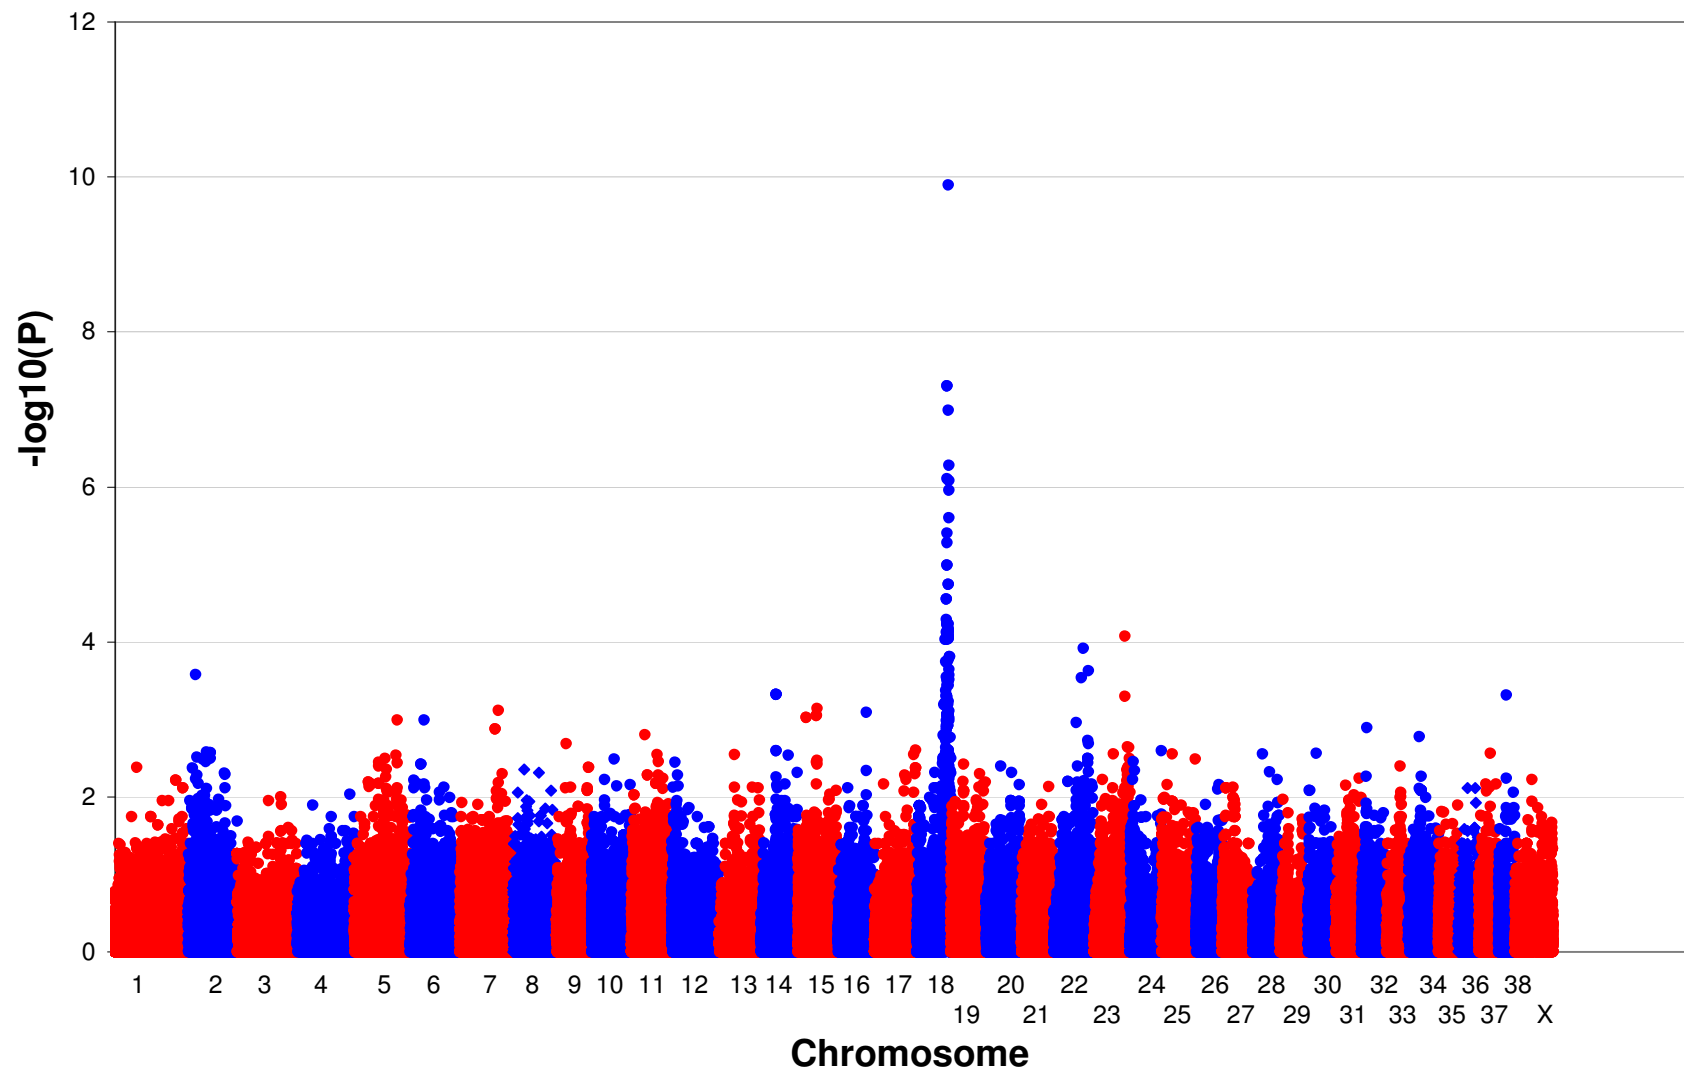

Supplement: pone.0064627.s002.pdf [file pone.0064627.s002.pdf]
