# Supplementary material for: Missense Mutation in CAPN1 Is Associated with Spinocerebellar Ataxia in the Parson Russell Terrier Dog Breed
Source: PubMed Central journal article supplement (PMC3669408; doi:10.1371/journal.pone.0064627), 2013-05-31
Supplement: pone.0064627.s005.pdf [file pone.0064627.s005.pdf]

| ID    | STATUS      | Origin         | Onset age    | Neurologist examined | Video | Case details reviewed by neurologist (LDR) | Clinical signs consistent with case definition?                                                                      | Matched control ID | Relationship of control to case |
|-------|-------------|----------------|--------------|----------------------|-------|--------------------------------------------|----------------------------------------------------------------------------------------------------------------------|--------------------|---------------------------------|
| 11445 | Ataxia case | UK             | 8 months     | No                   | No    | Yes                                        | Owner reported case                                                                                                  | 11491              | Half sibling                    |
| 11453 | Ataxia case | UK             | unknown      | No                   | Yes   | Yes                                        | Yes, video consistent with typical case definition                                                                   | 11294              | Half sibling                    |
| 11837 | Ataxia case | UK             | 10 months    | No                   | No    | Yes                                        | Owner reported case                                                                                                  | 12205              | Half sibling                    |
| 12015 | Ataxia case | New Zealand    | 10-12 months | No                   | No    | Yes                                        | Yes, onset age and vet notes consistent with typical case definition                                                 | 12125              | Half sibling                    |
| 12118 | Ataxia case | Czech Republic | 7 months     | Yes                  | Yes   | Yes                                        | Yes, referral notes consistent with typical case definition                                                          | 11291              | Mother                          |
| 12573 | Ataxia case | New Zealand    | unknown      | No                   | No    | Yes                                        | Owner reported case                                                                                                  | 12018              | Mother                          |
| 12835 | Ataxia case | UK             | <6 months    | No                   | No    | Yes                                        | No, hypermetric front limb gait and horizontal head twitch and onset age not consistent with typical case definition | 12837              | Father                          |
| 12854 | Ataxia case | UK             | unknown      | No                   | No    | Yes                                        | Owner reported case                                                                                                  | 12947              | Sibling                         |
| 14528 | Ataxia case | UK             | 12 months    | Yes                  | Yes   | Yes                                        | Yes, examined by two independent veterinary neurologists                                                             | -                  | -                               |
| 17526 | Ataxia case | USA            | 7-8 months   | No                   | No    | Yes                                        | Owner reported case                                                                                                  | 12899              | Half sibling                    |
| 17545 | Ataxia case | Belgium        | unknown      | No                   | No    | Yes                                        | Owner reported case                                                                                                  | 17477              | Unrelated at grandparent level  |
| 17546 | Ataxia case | Belgium        | unknown      | No                   | No    | Yes                                        | Owner reported case                                                                                                  | 17529              | Unrelated at grandparent level  |
| 17547 | Ataxia case | Belgium        | unknown      | No                   | No    | Yes                                        | Owner reported case                                                                                                  | 17553              | Unrelated at grandparent level  |
| 17933 | Ataxia case | USA            | 8 months     | No                   | No    | Yes                                        | Owner reported case                                                                                                  | 18032              | Unrelated at grandparent level  |
| 18188 | Ataxia case | UK             | unknown      | No                   | No    | Yes                                        | Owner reported case                                                                                                  | 18502              | Sibling                         |
| 18500 | Ataxia case | Holland        | 7 months     | Yes                  | Yes   | Yes                                        | Yes, video consistent with typical case definition                                                                   | 18501 & 12899      | Mother & Half sibling           |
