# Supplementary material for: Missense Mutation in CAPN1 Is Associated with Spinocerebellar Ataxia in the Parson Russell Terrier Dog Breed
Source: PubMed Central journal article supplement (PMC3669408; doi:10.1371/journal.pone.0064627), 2013-05-31
Supplement: pone.0064627.s006.pdf [file pone.0064627.s006.pdf]

| Chromosome | Base position | Type  | Consequence                         |
|------------|---------------|-------|-------------------------------------|
| chr18      | 54147546      | SNP   | G_INTRONIC                          |
| chr18      | 54806784      | SNP   | T_DOWNSTREAM                        |
| chr18      | 54834860      | SNP   | T_UPSTREAM                          |
| chr18      | 54834925      | SNP   | T_UPSTREAM                          |
| chr18      | 54835424      | SNP   | A_UPSTREAM                          |
| chr18      | 54835743      | SNP   | A_UPSTREAM                          |
| chr18      | 54835906      | SNP   | G_UPSTREAM                          |
| chr18      | 54836122      | SNP   | A_UPSTREAM                          |
| chr18      | 54837638      | SNP   | T_INTRONIC                          |
| chr18      | 54840102      | SNP   | C_INTRONIC                          |
| chr18      | 54841610      | SNP   | T_DOWNSTREAM                        |
| chr18      | 54841654      | SNP   | A_DOWNSTREAM                        |
| chr18      | 54844842      | SNP   | A_DOWNSTREAM                        |
| chr18      | 54845696      | INDEL | INS_DOWNSTREAM                      |
| chr18      | 54845982      | SNP   | G_DOWNSTREAM                        |
| chr18      | 54858698      | SNP   | A_UPSTREAM                          |
| chr18      | 54869070      | INDEL | DEL_INTRONIC                        |
| chr18      | 54872648      | SNP   | A_UPSTREAM                          |
| chr18      | 54872962      | SNP   | T_UPSTREAM                          |
| chr18      | 54873168      | SNP   | A_UPSTREAM                          |
| chr18      | 54873206      | INDEL | INS_UPSTREAM                        |
| chr18      | 54919810      | SNP   | A_INTRONIC                          |
| chr18      | 54934495      | SNP   | T_INTERGENIC                        |
| chr18      | 54938409      | SNP   | A_INTERGENIC                        |
| chr18      | 54941771      | SNP   | T_INTERGENIC                        |
| chr18      | 54942354      | SNP   | T_INTERGENIC                        |
| chr18      | 54945643      | SNP   | A_INTERGENIC                        |
| chr18      | 54946289      | SNP   | T_INTERGENIC                        |
| chr18      | 54946549      | INDEL | INS_INTERGENIC                      |
| chr18      | 54949116      | SNP   | A_INTERGENIC                        |
| chr18      | 54950071      | SNP   | A_INTERGENIC                        |
| chr18      | 54979508      | INDEL | INS_DOWNSTREAM                      |
| chr18      | 54982957      | SNP   | T_INTRONIC                          |
| chr18      | 54987373      | SNP   | A_INTRONIC                          |
| chr18      | 54988675      | SNP   | A_INTRONIC                          |
| chr18      | 55002285      | SNP   | A_INTRONIC                          |
| chr18      | 55015088      | SNP   | T_INTRONIC                          |
| chr18      | 55032013      | SNP   | T_INTRONIC                          |
| chr18      | 55033641      | SNP   | A_INTRONIC                          |
| chr18      | 55034306      | SNP   | T_NON_SYNONYMOUS_CODING CAPN1 C115Y |
| chr18      | 55051929      | SNP   | T_UPSTREAM                          |
| chr18      | 55068865      | SNP   | T_INTERGENIC                        |
| chr18      | 55072232      | SNP   | T_INTERGENIC                        |
| chr18      | 55083317      | SNP   | C_UPSTREAM                          |
| chr18      | 55084753      | SNP   | A_UPSTREAM                          |
| chr18      | 55104243      | SNP   | C_DOWNSTREAM                        |
| chr18      | 55105267      | SNP   | A_INTRONIC                          |
| chr18      | 55107297      | SNP   | A_INTRONIC                          |
| chr18      | 55107498      | INDEL | DEL_INTRONIC                        |
| chr18      | 55107873      | SNP   | C_INTRONIC                          |
| chr18      | 55109826      | SNP   | A_INTRONIC                          |
| chr18      | 55110148      | INDEL | DEL_INTRONIC                        |
| chr18      | 55113209      | SNP   | G_INTRONIC                          |
| chr18      | 55113424      | SNP   | C_INTRONIC                          |
| chr18      | 55115671      | SNP   | G_INTRONIC                          |
| chr18      | 55115691      | SNP   | G_INTRONIC                          |
| chr18      | 55120823      | SNP   | G_INTRONIC                          |
| chr18      | 55121762      | INDEL | DEL_INTRONIC                        |

|       |          |       |                                        |
|-------|----------|-------|----------------------------------------|
| chr18 | 55129178 | INDEL | DEL_INTRONIC                           |
| chr18 | 55129602 | SNP   | G_INTRONIC                             |
| chr18 | 55130944 | SNP   | T_NON_SYNONYMOUS_CODING VPS51 E24K     |
| chr18 | 55131116 | SNP   | C_INTRONIC                             |
| chr18 | 55137241 | SNP   | A_INTRONIC                             |
| chr18 | 55138179 | SNP   | T_INTRONIC                             |
| chr18 | 55146289 | SNP   | A_INTRONIC                             |
| chr18 | 55146383 | SNP   | G_INTRONIC                             |
| chr18 | 55146756 | SNP   | A_INTRONIC                             |
| chr18 | 55149036 | SNP   | G_INTRONIC                             |
| chr18 | 55152325 | SNP   | A_INTRONIC                             |
| chr18 | 55152649 | SNP   | T_INTRONIC                             |
| chr18 | 55153753 | SNP   | A_INTRONIC                             |
| chr18 | 55155557 | SNP   | G_INTRONIC                             |
| chr18 | 55157953 | SNP   | A_INTRONIC                             |
| chr18 | 55159180 | SNP   | A_INTRONIC                             |
| chr18 | 55173974 | SNP   | T_INTRONIC                             |
| chr18 | 55175535 | INDEL | INS_INTRONIC                           |
| chr18 | 55188478 | SNP   | T_DOWNSTREAM                           |
| chr18 | 55188984 | SNP   | C_DOWNSTREAM                           |
| chr18 | 55192173 | SNP   | T_UPSTREAM                             |
| chr18 | 55194978 | SNP   | A_INTRONIC                             |
| chr18 | 55195382 | SNP   | A_INTRONIC                             |
| chr18 | 55200159 | SNP   | C_INTRONIC                             |
| chr18 | 55222654 | SNP   | T_DOWNSTREAM                           |
| chr18 | 55249754 | INDEL | DEL_INTRONIC                           |
| chr18 | 55352472 | SNP   | A_NON_SYNONYMOUS_CODING CDC42BPG G689R |
| chr18 | 55354056 | SNP   | A_INTRONIC                             |
| chr18 | 55371811 | SNP   | A_UPSTREAM                             |
| chr18 | 55372281 | SNP   | G_SYNONYMOUS_CODING                    |
| chr18 | 55377582 | SNP   | T_DOWNSTREAM                           |
| chr18 | 55382018 | SNP   | A_DOWNSTREAM                           |
| chr18 | 55382921 | SNP   | A_INTRONIC                             |
| chr18 | 55383138 | SNP   | T_INTRONIC                             |
| chr18 | 55384340 | SNP   | A_INTRONIC                             |
| chr18 | 55385447 | SNP   | A_INTRONIC                             |
| chr18 | 55401520 | SNP   | G_UPSTREAM                             |
| chr18 | 55405494 | SNP   | T_INTRONIC                             |
| chr18 | 55405973 | SNP   | C_INTRONIC                             |
| chr18 | 55451852 | SNP   | T_DOWNSTREAM                           |
| chr18 | 55511405 | SNP   | A_INTRONIC                             |
| chr18 | 55523280 | SNP   | T_INTRONIC                             |
| chr18 | 55524712 | SNP   | T_INTRONIC                             |
| chr18 | 55588876 | SNP   | C_INTERGENIC                           |
| chr18 | 55607893 | SNP   | A_INTRONIC                             |
| chr18 | 55618004 | SNP   | C_INTERGENIC                           |
| chr18 | 55634143 | SNP   | T_INTERGENIC                           |
| chr18 | 55634376 | SNP   | C_INTERGENIC                           |
| chr18 | 55635088 | INDEL | DEL_INTERGENIC                         |
| chr18 | 55638891 | SNP   | A_INTERGENIC                           |
| chr18 | 55640395 | SNP   | G_INTERGENIC                           |
| chr18 | 55641250 | SNP   | T_INTERGENIC                           |
| chr18 | 55641937 | INDEL | INS_INTERGENIC                         |
| chr18 | 55642330 | SNP   | A_INTERGENIC                           |
| chr18 | 55644502 | SNP   | T_INTERGENIC                           |
| chr18 | 55644705 | SNP   | G_INTERGENIC                           |
| chr18 | 55645554 | SNP   | T_INTERGENIC                           |
| chr18 | 55645725 | SNP   | A_INTERGENIC                           |
| chr18 | 55647128 | SNP   | G_INTERGENIC                           |

|       |          |     |              |
|-------|----------|-----|--------------|
| chr18 | 55647279 | SNP | T_INTERGENIC |
| chr18 | 55647608 | SNP | C_INTERGENIC |
| chr18 | 55655406 | SNP | A_INTERGENIC |
| chr18 | 55655666 | SNP | A_INTERGENIC |
| chr18 | 55655809 | SNP | A_INTERGENIC |
| chr18 | 55655946 | SNP | G_INTERGENIC |
| chr18 | 55655954 | SNP | A_INTERGENIC |
| chr18 | 55655983 | SNP | G_INTERGENIC |
| chr18 | 55656250 | SNP | T_INTERGENIC |
| chr18 | 55658118 | SNP | G_INTERGENIC |
| chr18 | 55660886 | SNP | T_INTERGENIC |
| chr18 | 55662353 | SNP | C_INTERGENIC |
| chr18 | 55663080 | SNP | A_INTERGENIC |
| chr18 | 55663100 | SNP | T_INTERGENIC |
| chr18 | 55667091 | SNP | A_INTERGENIC |
| chr18 | 55667274 | SNP | T_INTERGENIC |
| chr18 | 55667372 | SNP | A_INTERGENIC |
| chr18 | 55667619 | SNP | C_INTERGENIC |
| chr18 | 55670711 | SNP | A_INTERGENIC |
| chr18 | 55682394 | SNP | T_INTERGENIC |
| chr18 | 55698803 | SNP | T_INTERGENIC |
| chr18 | 55701874 | SNP | A_INTERGENIC |
| chr18 | 55724206 | SNP | A_INTERGENIC |
| chr18 | 55736847 | SNP | C_INTRONIC   |
| chr18 | 55747955 | SNP | A_UPSTREAM   |
